# Supplementary material for: Antioxidants and NOX1/NOX4 inhibition blocks TGFβ1-induced CCN2 and α-SMA expression in dermal and gingival fibroblasts
Source: PubMed Central journal article supplement (PMC5648211; doi:10.1371/journal.pone.0186740), 2017-10-19

**A**Dermal Fibroblasts

|             |   |   |   |   |
|-------------|---|---|---|---|
| TGF $\beta$ | - | - | + | + |
| PF          | - | + | - | + |

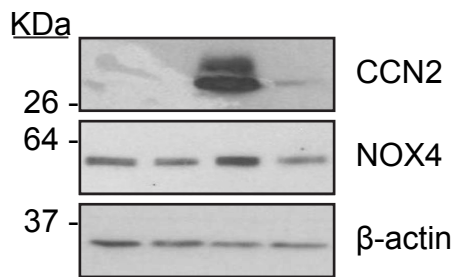**B**Gingival Fibroblasts

|             |   |   |   |   |
|-------------|---|---|---|---|
| TGF $\beta$ | - | - | + | + |
| PF          | - | + | - | + |

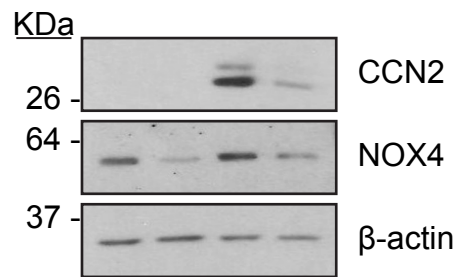

Supplement: pone.0186740.s003.pdf [file pone.0186740.s003.pdf]
