# Supplementary material for: Antioxidants and NOX1/NOX4 inhibition blocks TGFβ1-induced CCN2 and α-SMA expression in dermal and gingival fibroblasts
Source: PubMed Central journal article supplement (PMC5648211; doi:10.1371/journal.pone.0186740), 2017-10-19

**A**

## Dermal Fibroblasts

|             |   |     |     |      |   |     |     |      |
|-------------|---|-----|-----|------|---|-----|-----|------|
| TGF $\beta$ | - | -   | -   | -    | + | +   | +   | +    |
| OXO         | - | 400 | 800 | 1600 | - | 400 | 800 | 1600 |

KDa

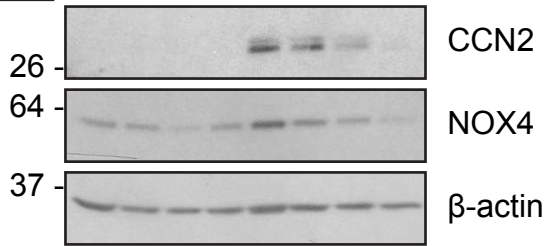**B**

## Gingival Fibroblasts

|             |   |     |     |      |   |     |     |      |
|-------------|---|-----|-----|------|---|-----|-----|------|
| TGF $\beta$ | - | -   | -   | -    | + | +   | +   | +    |
| OXO         | - | 400 | 800 | 1600 | - | 400 | 800 | 1600 |

KDa

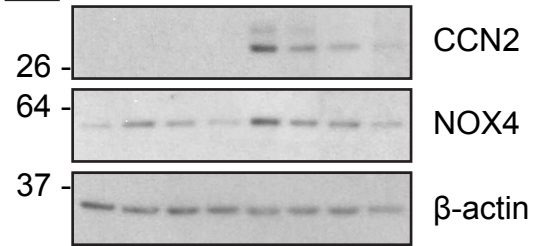

Supplement: pone.0186740.s004.pdf [file pone.0186740.s004.pdf]
